# Supplementary material for: In situ growth of ZIF-8 on gold nanoparticles/magnetic carbon nanotubes for the electrochemical detection of bisphenol A
Source: Royal Society of Chemistry journal article supplement (doi:10.1039/d1ay00324k), 2021-01-01
Supplement: d1ay00324k1.pdf [file d1ay00324k1.pdf]

**Electronic Supplementary Information for**

**In-situ growth of ZIF-8 on gold nanoparticles/magnetic carbon  
nanotubes for electrochemical detection of bisphenol A**

Hexiang Li<sup>a,§</sup>, Fawei Zhu<sup>a,§</sup>, Jun Xiang<sup>b</sup>, Fangbin Wang<sup>b</sup>, Qi Liu<sup>a,b,\*</sup>, Xiaoqing Chen<sup>a</sup>

<sup>a</sup>College of Chemistry and Chemical Engineering, Key Laboratory of Hunan Province for Water Environment and Agriculture Product Safety, Central South University, Changsha 410083, China

<sup>b</sup>Hunan Institute of Food Quality Supervision Inspection and Research, the Hunan Provincial Key Laboratory of Food Safety Monitoring and Early Warning, Changsha 410083, Hunan, China.

<sup>§</sup>These authors contributed equally to this work.

\*E-mail address: [iliuqi@csu.edu.cn](mailto:iliuqi@csu.edu.cn) (Qi Liu).

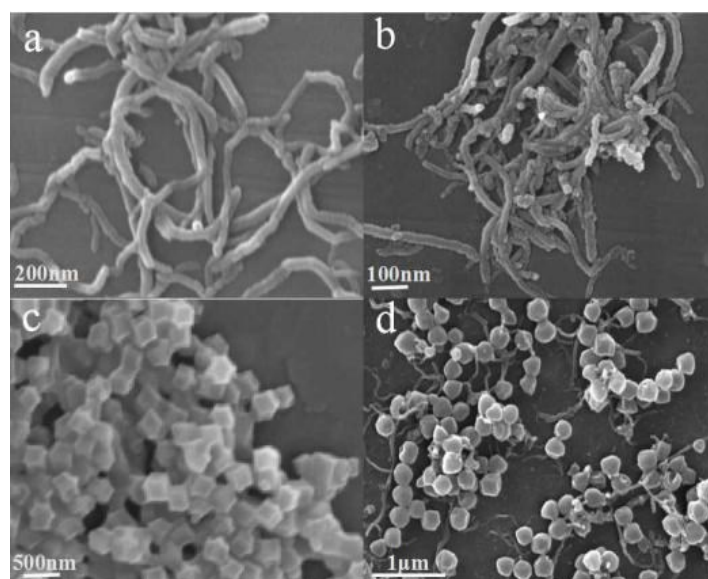

**Fig. S1** SEM of mCNTs (a), AuNPs/mCNTs (b), ZIF-8 (c), AuNPs/mCNTs@ZIF-8 (d)

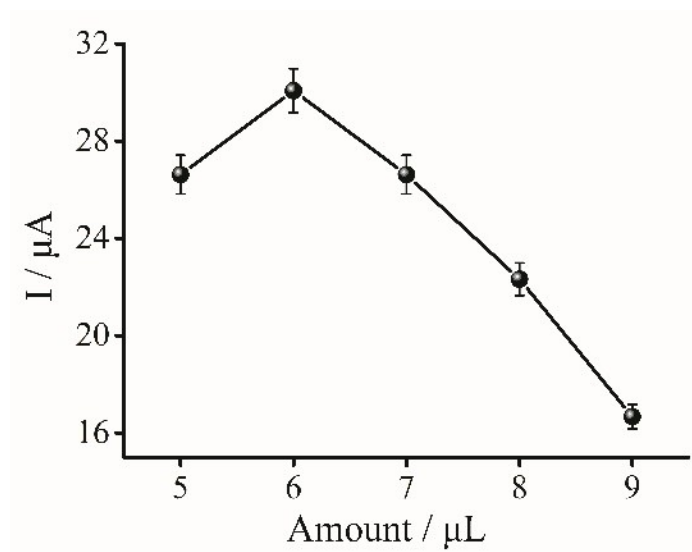

**Fig. S2** Effect of the amounts of AuNPs/mCNTs@ZIF-8 nanocomposites modified on the GCE in 0.1M PB buffer (pH=6) containing 50 μM BPA .

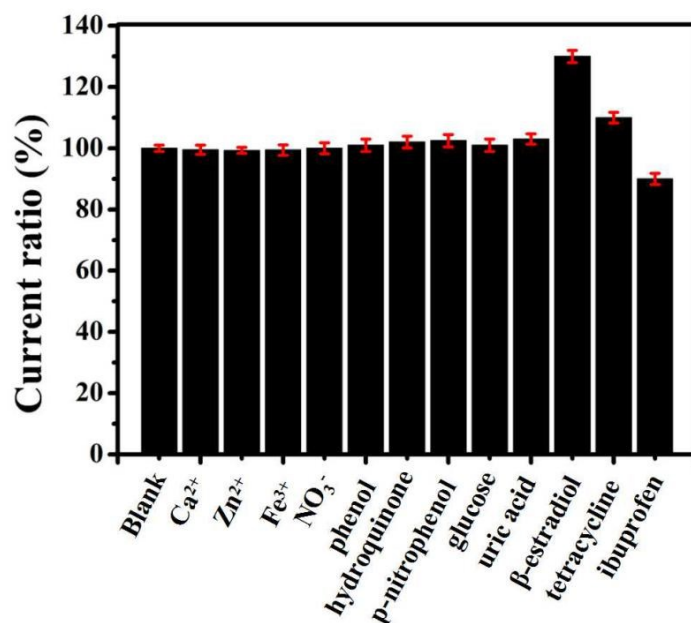

**Fig. S3** Peak currents of possible interfering species in the presence of 50  $\mu\text{M}$  BPA in 0.1 M PB buffer (pH=6).

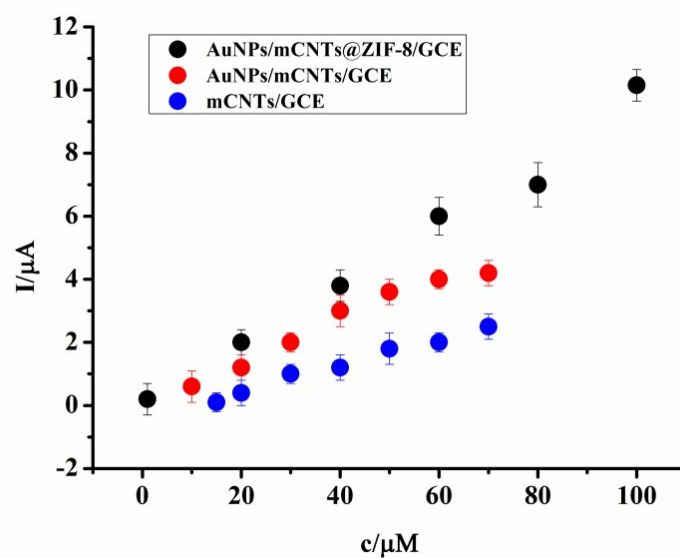

**Fig. S4** Calibration curves of BPA on bare glassy carbon electrode coated with AuNPs/mCNTs@ZIF-8, AuNPs/mCNTs, mCNTs in the presence of BPA (from 1 to 100  $\mu\text{M}$ ) in 0.1 M PB buffer (pH=6).

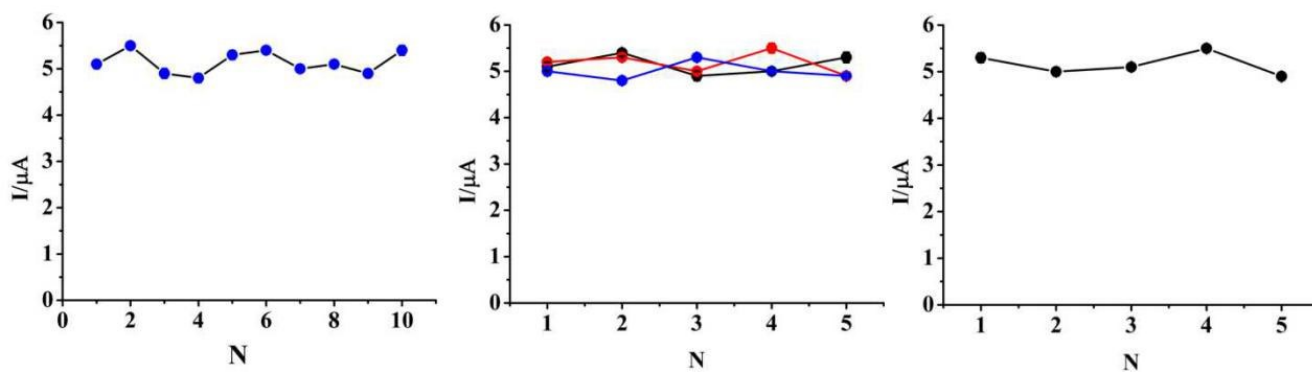

**Fig. S5** DPV for 50  $\mu\text{M}$  bisphenol A in 0.10 mol  $\text{L}^{-1}$  phosphate buffer solution (pH 6) on AuNPs/mCNTs@ZIF-8/GCE. Parameters: pulse amplitude 50 mV and scan rate 10  $\text{mV s}^{-1}$ . Ten consecutive experiments made at the same day (a), five consecutive experiments made in three different days (b), five consecutive experiments made in the same day without renewing the surface between the measurements.

**Table S1** Electrochemical parameters of mCNTs/GCE, AuNPs/mCNTs/GCE, AuNPs/mCNTs@ZIF-8/GCE, and bare electrode obtained from the analysis impedance data with the Randle's circuit [R(C[RW])]

| Electrode             | $R_s$ ( $\Omega$ ) | Cdl ( $\mu\text{F}$ ) | $R_{ct}$ ( $\Omega$ ) | $W$ ( $\mu\text{F}$ ) |
|-----------------------|--------------------|-----------------------|-----------------------|-----------------------|
| GCE                   | 362.1              | 4.84                  | 126.1                 | 1194.2                |
| mCNTs/GCE             | 361.4              | 4.91                  | 124.2                 | 1504.63               |
| AuNPs/mCNTs/GCE       | 360.2              | 5.67                  | 79.2                  | 417.95                |
| AuNPs/mCNTs@ZIF-8/GCE | 362.7              | 5.03                  | 112.3                 | 997.84                |

**Table S2** Determinations of BPA in real samples.

| Sample      | Added ( $\mu\text{M}$ ) | Founded ( $\mu\text{M}$ ) | Recovery (%) | RSD (%) |
|-------------|-------------------------|---------------------------|--------------|---------|
| Pond water  | 0                       | 0                         | -            | -       |
|             | 20                      | 21.5                      | 107.5        | 4.2     |
|             | 80                      | 80.8                      | 101.0        | 1.1     |
| Tap water   | 0                       | 0                         | -            | -       |
|             | 20                      | 19.3                      | 96.5         | 5.8     |
|             | 80                      | 79.4                      | 99.3         | 1.8     |
| River water | 0                       | 0                         | -            | -       |
|             | 20                      | 20.6                      | 103.0        | 3.9     |
|             | 80                      | 78.9                      | 98.6         | 1.6     |
